# Supplementary material for: Aft1 Nuclear Localization and Transcriptional Response to Iron Starvation Rely upon TORC2/Ypk1 Signaling and Sphingolipid Biosynthesis
Source: MDPI journal article supplement (doi:10.3390/ijms24032438), 2023-01-26
Supplement: s1 [file s1]

## Supplemental 1

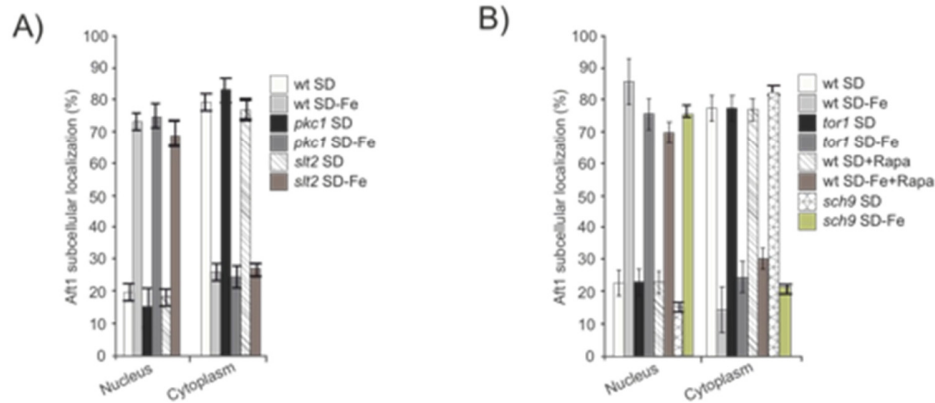

**Figure S1.** TORC1, Sch9, Pkc1 and Slt2 are not involved in Aft1 nuclear localization. Cultures were grown in SD or SD-Fe to exponential phase at 30°C. Samples were collected to elucidate Aft1 subcellular localization. **(A)** wt, *pkc1* and *slt2* strains transformed with pAft1GFP. **(B)** wt, *tor1* and wt treated with Rapamycin for 2 hours (Rapa) and *sch9* bearing pAft1GFP.

## Supplemental 2

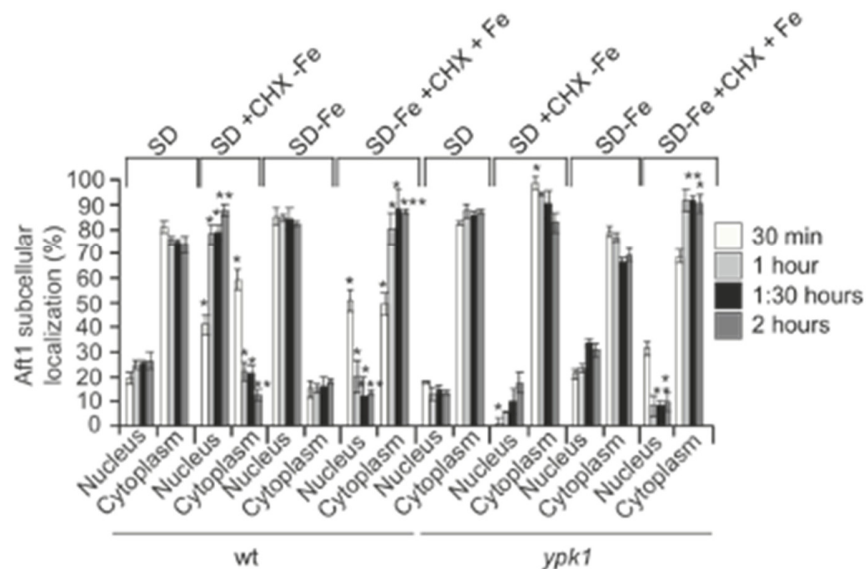

**Figure S2.** The absence of Ypk1 causes iron regulon deregulation during iron starvation. *In vivo* fluorescence observation at indicated times of wt and *ypk1* strains

bearing pAft1GFP. Cells were grown in SD or SD-Fe media until exponential phase, cultures were divided, cycloheximide (+CHX) was added before to both of them. The SD ones were washed and transferred to a media without iron with CHX; iron (+Fe) and CHX were added to SD-Fe culture.

### Supplemental 3

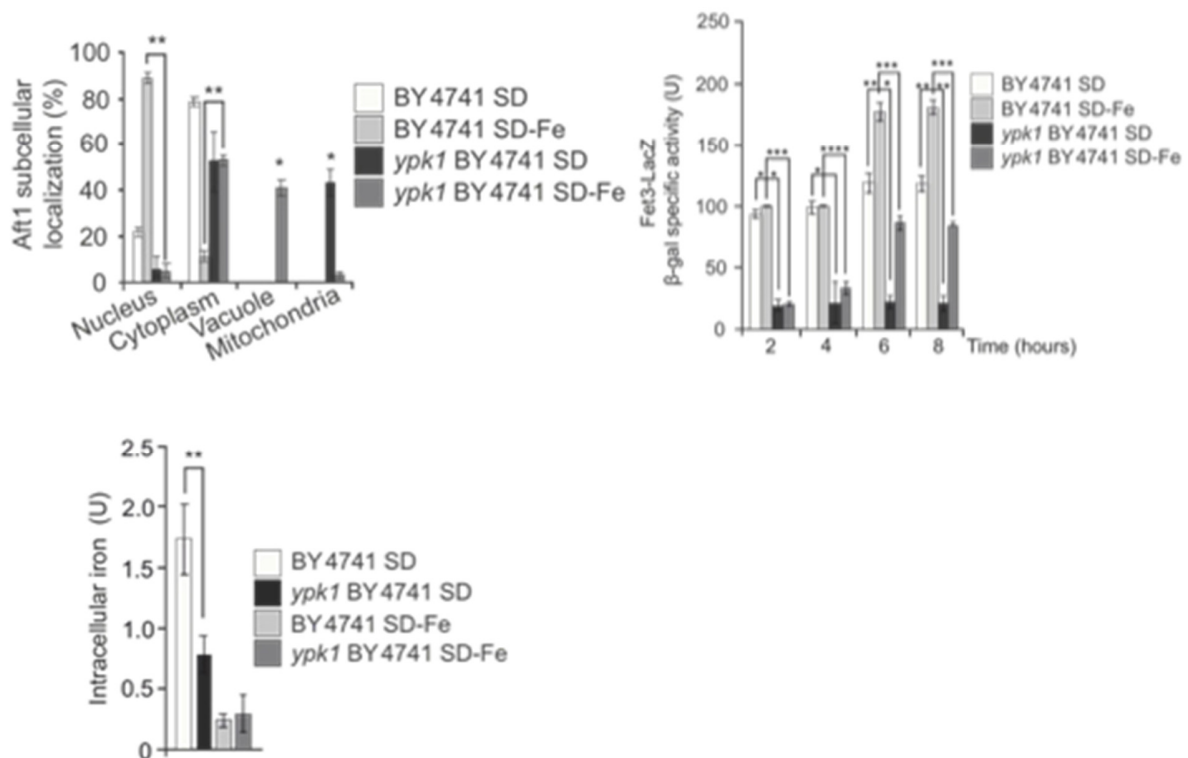

**Figure S3.** The absence of Ypk1 causes iron regulon deregulation during iron starvation. wt and *ypk1* strains in BY4741 background transformed with the plasmids pAft1GFP and pFET3-LacZ. Samples were collected to analyze Aft1 subcellular localization, the β-galactosidase activity and intracellular iron content. For Aft1 subcellular localization and intracellular iron content cells were logarithmically grown in SD medium plus amino acids or in iron-free SD (SD-Fe). For the β-galactosidase activity, cells were grown at 30°C in SD media to OD<sub>600</sub>:0.4. Aliquots were taken washed and transferred to SD or SD-Fe media for 8 hours. Every 2 hours samples were taken to determine the β-galactosidase activity reporter construct.

## Supplemental 4

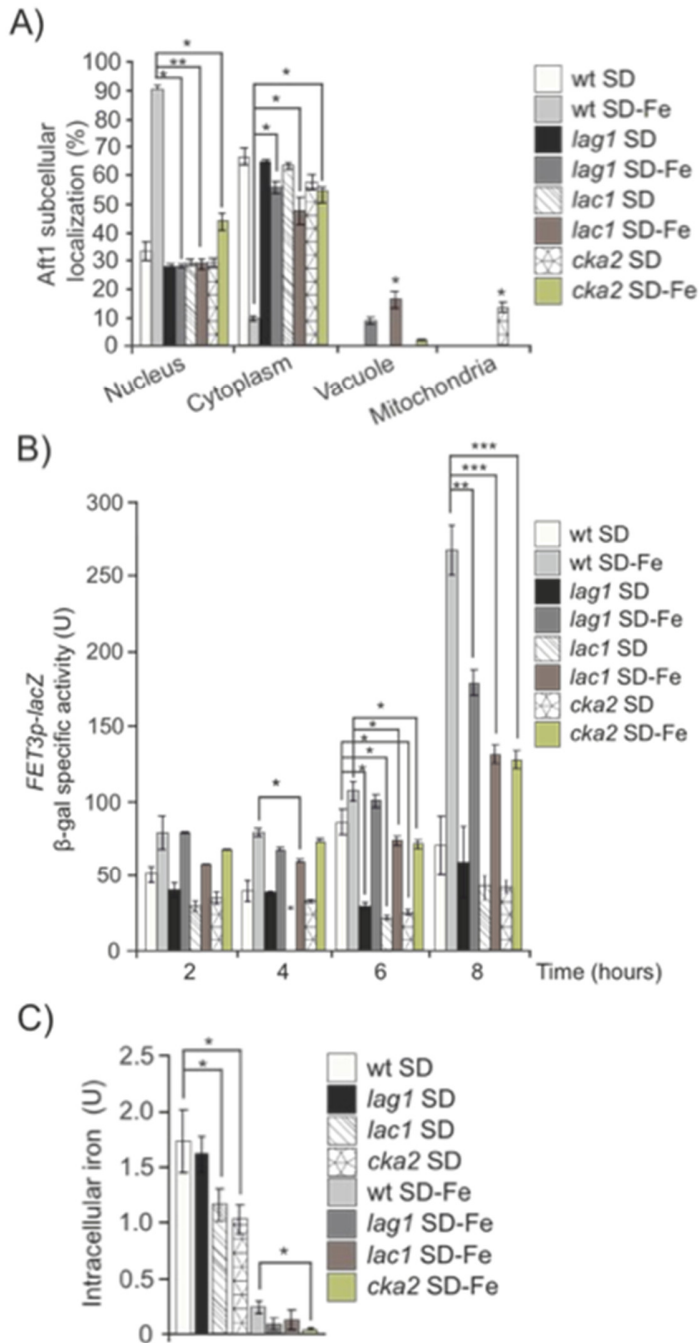

**Figure S4.** Levels of sphingolipids modify Aft1 localization. **(A)** Aft1 subcellular localization in wt, *lac1*, *lag1* and *cka2* strains, **(B)**  $\beta$ -galactosidase activity assay in wt, *lac1*, *lag1* and *cka2* strains, and **(C)** Intracellular iron assays in wt, *lac1*, *lag1* and *cka2* strains were performed as in Figure 4.

## Supplemental 5

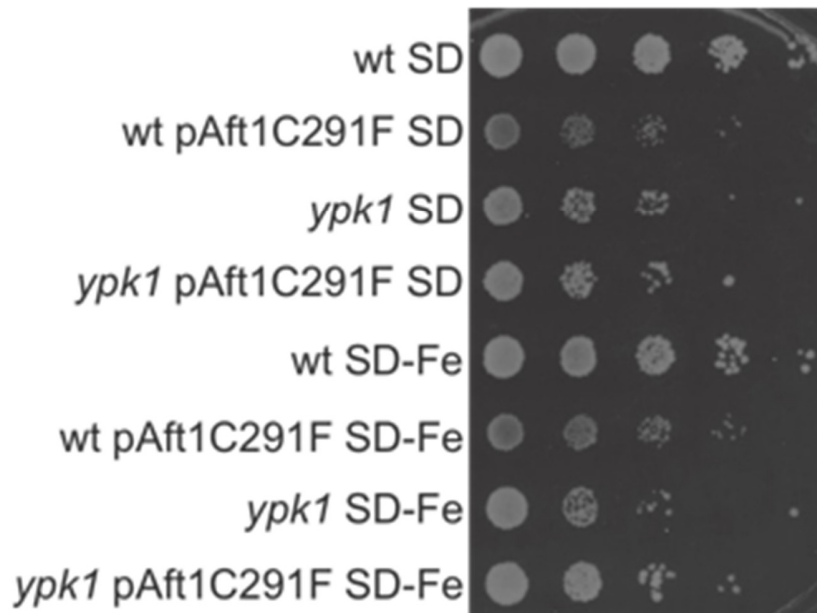

**Figure S5.** Aft1 nuclear localization is a prosurvival strategy to sphingolipids pathway impairment. wt, wt pAft1C291F, *ypk1* and *ypk1* pAft1C291F cultures were logarithmically grown in SD or SD-Fe medium plus amino acids to be subsequently plated in triplicate on YPD plates. Plates were grown at 30°C for three days in triplicate, here a representative plate is depicted.
